# Supplementary material
Source: PubMed Central journal article supplement (PMC2860578)

Type of file: figure

Label: Sup fig 1

Filename: SFig1.pdf

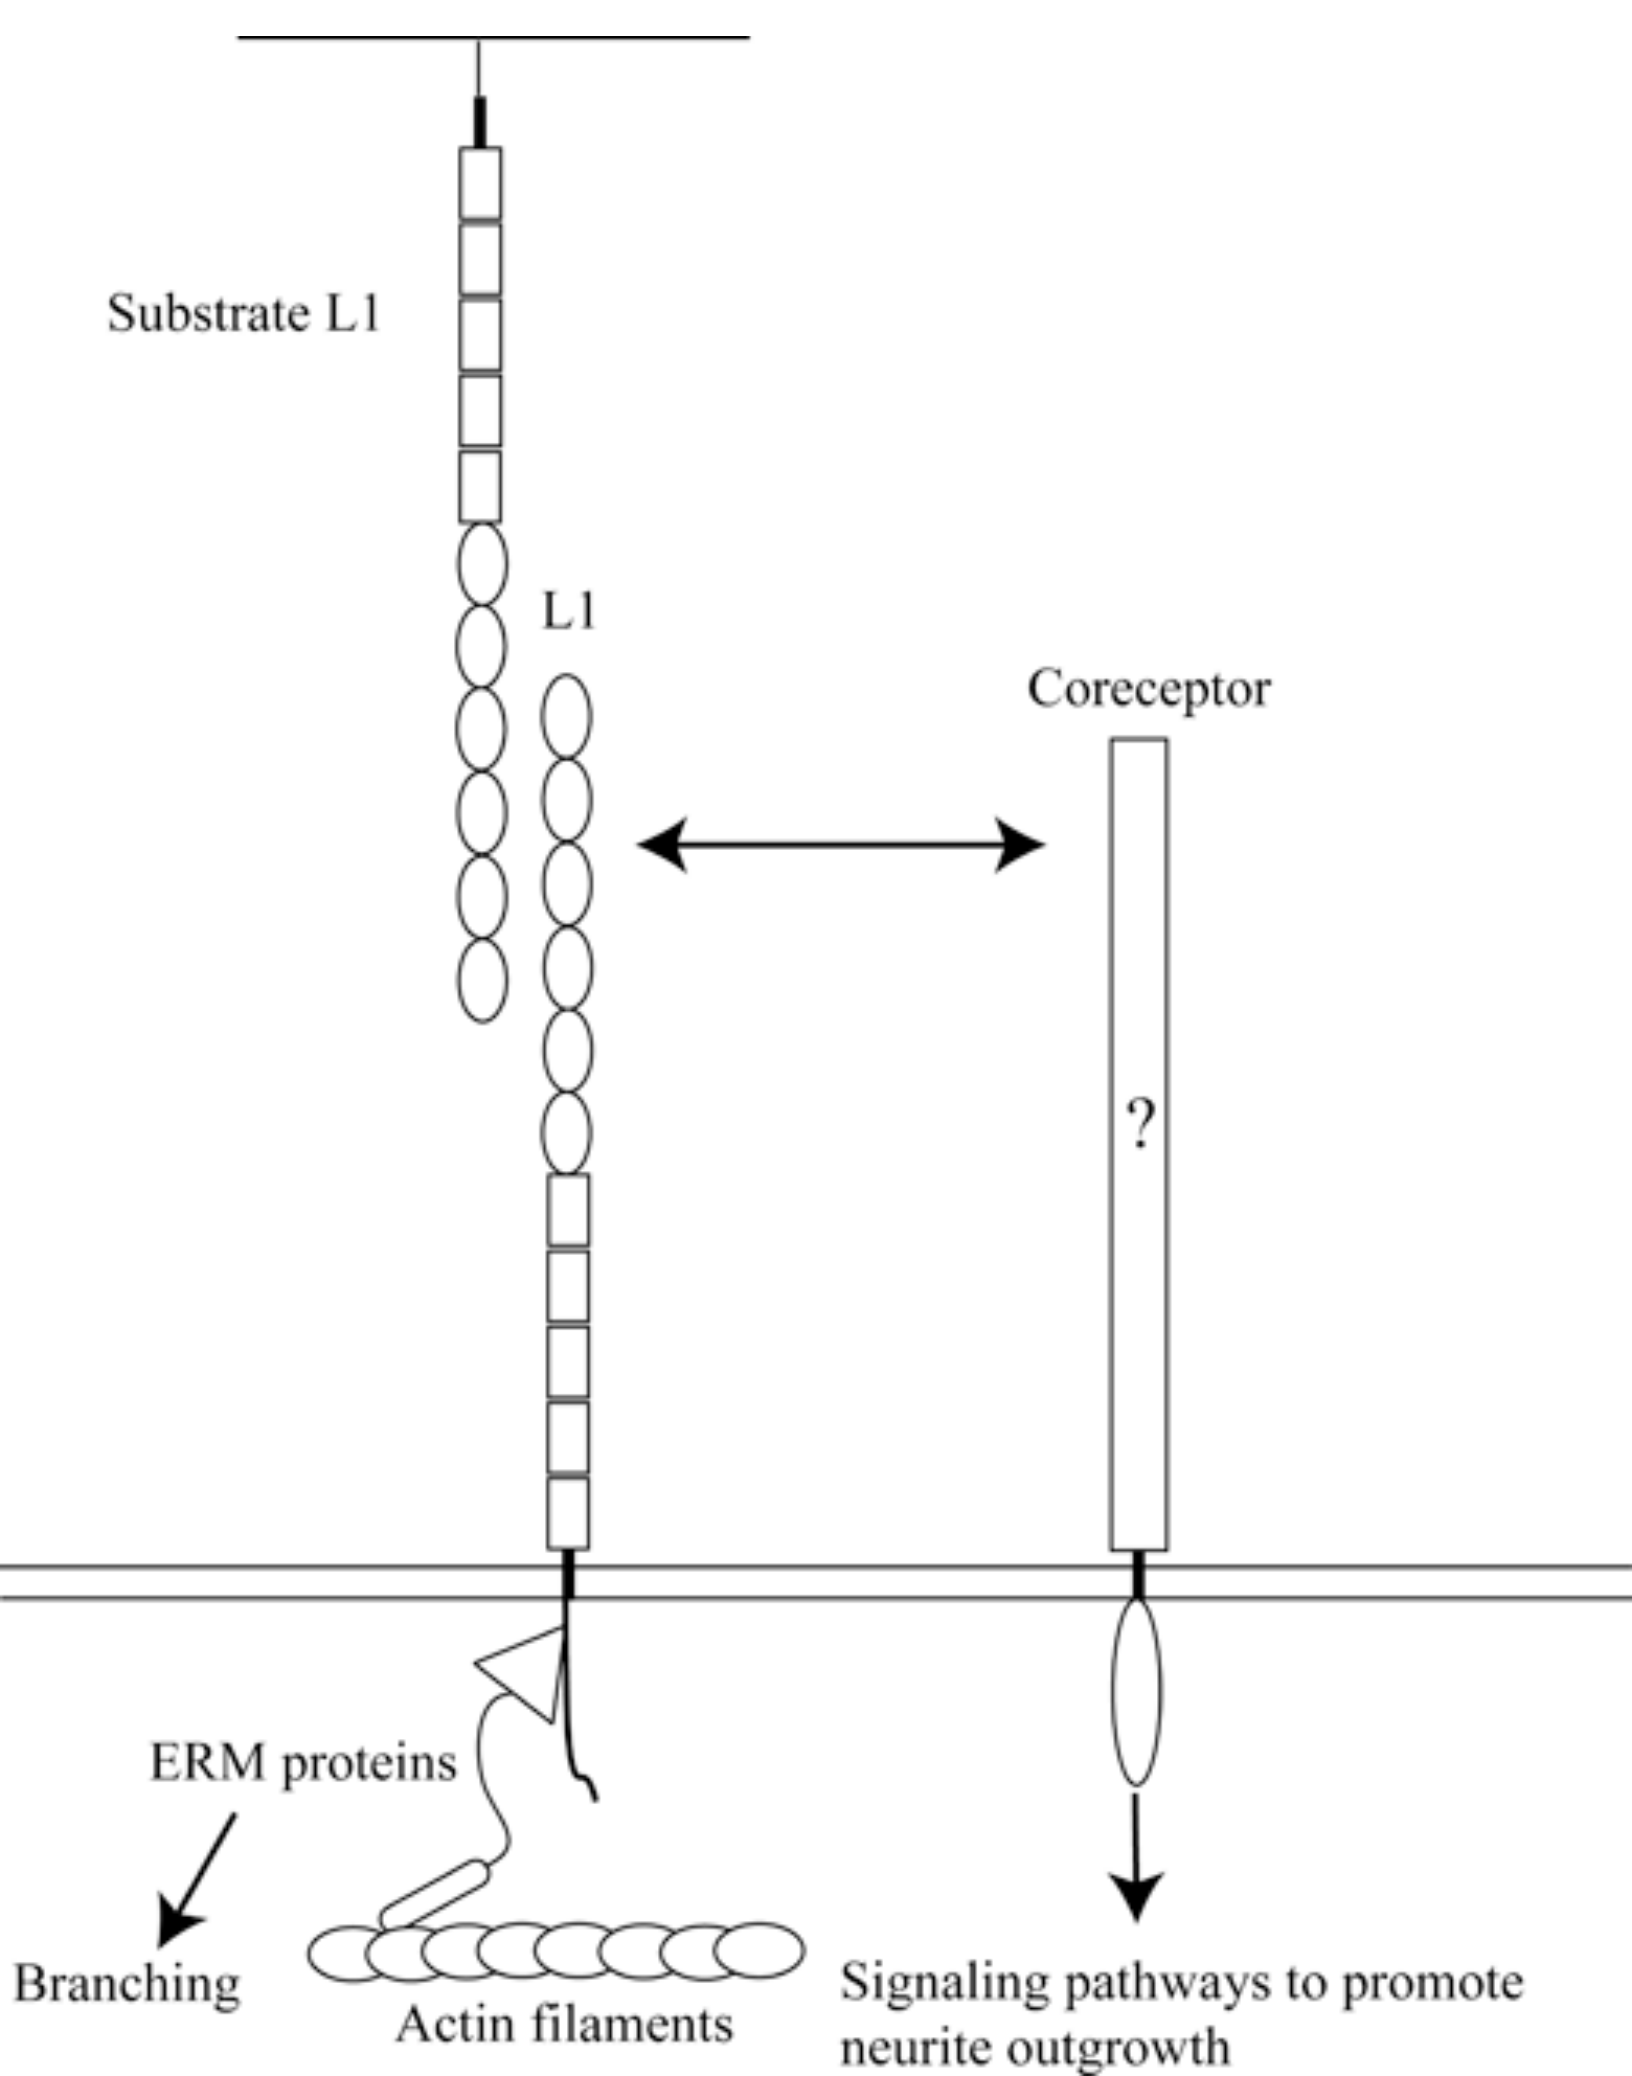

Type of file: figure

Label: Sup fig 2

Filename: SFig2.pdf

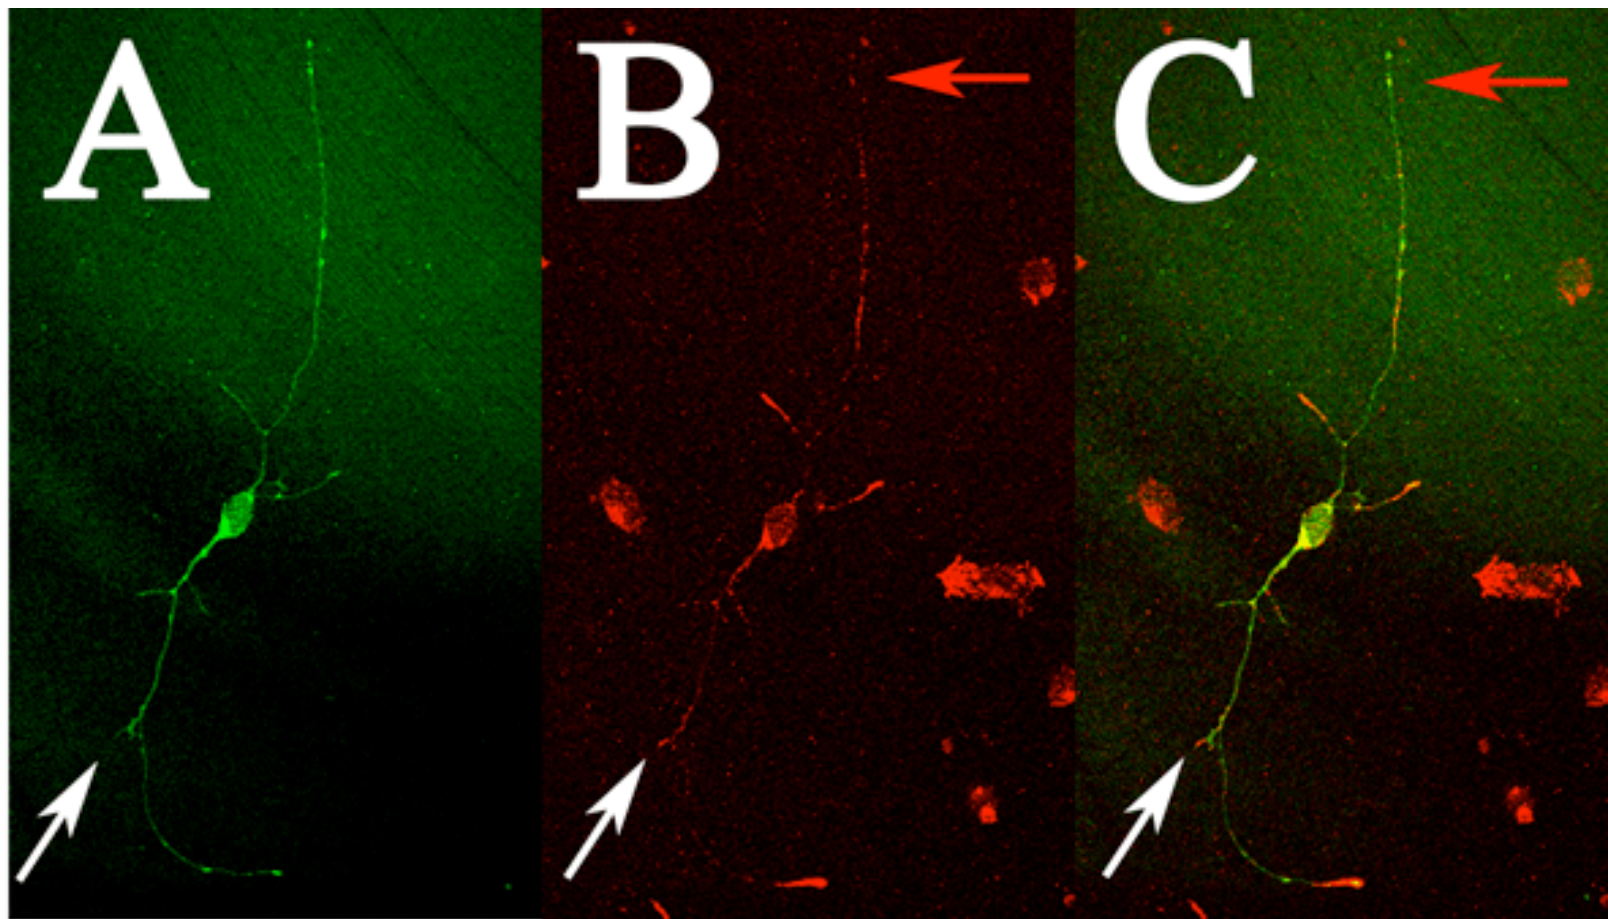

Supplement: NIHMS52389-supplement-01.pdf [file NIHMS52389-supplement-01.pdf]
