# Supplementary material
Source: PubMed Central journal article supplement (PMC2860578)
Supplement: NIHMS52389-supplement-sup_table_1.pdf [file NIHMS52389-supplement-sup_table_1.pdf]

**Supplemental Table 1. Raw data of the effects of intracellular mutations on L1-mediated neurite outgrowth**

| Mutation   | N <sub>M</sub> /N <sub>W</sub> | Total neurite length - microns | Longest neurite length - microns | Branches   | Primary neurites | Nodes      |
|------------|--------------------------------|--------------------------------|----------------------------------|------------|------------------|------------|
| L1-1176    | 50/88                          | 479±25/                        | 288±14/                          | 5±0.67/    | 3.54±0.41/       | 1.46±0.32/ |
|            |                                | 591±19                         | 288±10                           | 6.22±0.35  | 3.06±0.17        | 3.1±0.26   |
|            | 79/98                          | 451±18/                        | 284±12/                          | 5.54±0.45/ | 2.28±0.11/       | 3.2±0.39/  |
|            |                                | 536±16                         | 253±8                            | 8.2±0.4    | 2.92±0.13        | 5.07±0.35  |
| 79/85      | 458±20/                        | 261±12/                        | 5.10±0.39/                       | 2.84±0.19/ | 2.24±0.25/       |            |
|            | 630±21                         | 290±11                         | 8.59±0.54                        | 3.15±0.16  | 5.18±0.42        |            |
| L1-1180    | 73/88                          | 543±21/                        | 254±11/                          | 6.92±0.44/ | 4.01±0.34/       | 2.84±0.24/ |
|            |                                | 591±19                         | 288±10                           | 6.22±0.35  | 3.06±0.17        | 3.1±0.26   |
|            | 80/98                          | 464±19/                        | 223±11/                          | 8.4±0.57/  | 3.1±0.21/        | 5.15±0.44/ |
|            |                                | 536±16                         | 253±8                            | 8.2±0.4    | 2.92±0.13        | 5.07±0.35  |
| 92/93      | 584±22/                        | 239±10/                        | 10.84±0.69                       | 5.11±0.39/ | 5.54±0.44/       |            |
|            | 698±28                         | 288±9                          | 10.31±0.62                       | 4.06±0.26  | 6.02±0.50        |            |
| L1ΔRSLE    | 79/98                          | 451±18/                        | 263±11/                          | 5.65±0.35/ | 2.7±0.14/        | 2.84±0.29/ |
|            |                                | 536±16                         | 253±8                            | 8.2±0.4    | 2.92±0.13        | 5.07±0.35  |
|            | 88/88                          | 455±15/                        | 307±12/                          | 4.42±0.35/ | 2.92±0.22/       | 1.47±0.19/ |
|            |                                | 591±19                         | 288±10                           | 6.22±0.35  | 3.06±0.17        | 3.1±0.26   |
| 36/85      | 444±35/                        | 244±14/                        | 5.69±0.71/                       | 3.08±0.35/ | 2.5±0.42/        |            |
|            | 642±22                         | 273±10                         | 8.28±0.54                        | 2.99±0.13  | 5.13±0.46        |            |
| L1-1147    | 106/104                        | 276±10/                        | 200±8/                           | 3.29±0.23/ | 2.52±0.18/       | 0.77±0.12/ |
|            |                                | 516±14                         | 243±6                            | 5.29±0.25  | 2.72±0.12        | 2.58±0.19  |
|            | 96/79                          | 325±12/                        | 290±10/                          | 2.45±0.19/ | 1.79±0.14/       | 0.64±0.11/ |
|            |                                | 652±20                         | 285±11                           | 6.91±0.44  | 3.25±0.18        | 3.54±0.32  |
| 76/97      | 219±11/                        | 177±10/                        | 2.61±0.25/                       | 2.13±0.19/ | 0.47±0.14/       |            |
|            | 506±18                         | 264±10                         | 4.88±0.29                        | 2.62±0.13  | 2.21±0.22        |            |
| L1-4A      | 93/67                          | 204±7/                         | 153±5/                           | 2.14±0.09/ | 1.83±0.05/       | 0.31±0.08/ |
|            |                                | 357±15                         | 190±6                            | 4.93±0.30  | 2.51±0.14        | 2.39±0.23  |
|            | 103/103                        | 280±10/                        | 210±8/                           | 2.53±0.15/ | 1.84±0.06/       | 0.67±0.11/ |
|            |                                | 540±20                         | 260±9                            | 6.85±0.40  | 3.12±0.15        | 3.64±0.29  |
| 87/80      | 266±10/                        | 195±8/                         | 2.59±0.14/                       | 2±0.08/    | 0.57±0.1/        |            |
|            | 480±14                         | 251±8                          | 5.10±0.34                        | 2.35±0.1   | 2.7±0.31         |            |
| L1-1151Y>A | 97/67                          | 232±9/                         | 174±7/                           | 2.24±0.11/ | 1.91±0.06/       | 0.32±0.08/ |
|            |                                | 357±15                         | 190±6                            | 4.93±0.30  | 2.51±0.14        | 2.39±0.23  |
|            | 95/103                         | 325±14/                        | 233±11/                          | 3.32±0.19/ | 2.08±0.02/       | 1.22±0.16/ |
|            |                                | 540±20                         | 260±9                            | 6.85±0.40  | 3.12±0.15        | 3.64±0.29  |
| 92/87      | 318±15/                        | 225±11/                        | 3.45±0.22                        | 2.11±0.08/ | 1.32±0.18/       |            |
|            | 493±18                         | 247±10                         | 6.99±0.50                        | 2.91±0.15  | 4±0.4            |            |

In all experiments mutant L1 or WT HL1 was transfected into L1KO neurons and plated on L1 substrates. About 80-100 of the L1KO neurons expressing HL1 were analyzed and used as reference values for determining the degree of neurite growth and branching for the different mutants. For each mutant, values from three independent trials were listed.

The values before the slash were the mean $\pm$  SEM of mutant L1-expression neurons. The values after the slash were the mean $\pm$  SEM of WT HL1-expression neurons in the same set of experiment.  $N_M$  is the number of mutant L1-expressing neurons measured and  $N_W$  is the number of WT HL1-expressing neurons measured in the same set of experiment. Values for the total neurite length, longest neurite length, branches (primary, secondary and tertiary neurites), primary neurites from the soma, and nodes (secondary and tertiary neurites) were listed.
